# Supplementary material
Source: PubMed Central journal article supplement (PMC2401335)
Supplement: M700399-MCP200_2.pdf [file M700399-MCP200_2.pdf]

**Supplementary Table 1:** Listing of proteins identified in global proteomics experiments with high confidence and differential expression,  $\leq / \geq 10\%$ ,  $p \leq 0.1$ , after exposure to noggin protein.

| <u>RefSeq</u> | <u>IPI</u>               | <u>Protein Name</u>                                               | <u>Fold Change</u> | <u>p-value</u> | <u># of spectra utilized for quantitation</u> | <u># of unique peptides</u> | <u>% Coverage*</u> |
|---------------|--------------------------|-------------------------------------------------------------------|--------------------|----------------|-----------------------------------------------|-----------------------------|--------------------|
|               | IPI00472102              | 60 kDa heat shock protein, mitochondrial precursor                | 0.88               | 0.03           | 144                                           | 15                          | 42.10%             |
| NP_002070     | IPI00219029              | Aspartate aminotransferase, cytoplasmic                           | 1.14               | 0.08           | 2                                             | 2                           | 4.61%              |
| NP_001688     | IPI00007611              | ATP synthase O subunit, mitochondrial precursor                   | 1.16               | 0.02           | 2                                             | 2                           | 15.50%             |
| NP_005909     | IPI00291006              | Malate dehydrogenase, mitochondrial precursor                     | 0.90               | 0.10           | 41                                            | 6                           | 24.90%             |
| NP_006507     | IPI00220194, IPI00641837 | Solute carrier family 2, facilitated glucose transporter member 1 | 0.88               | 0.10           | 22                                            | 2                           | 3.60%              |
| NP_009223     | IPI00296907, IPI00477729 | Splice Isoform 1 of Acyl-coenzyme A oxidase 1, peroxisomal        | 1.27               | 0.02           | 3                                             | 2                           | 4.39%              |
| NP_006422     | IPI00297779              | T-complex protein 1, beta subunit                                 | 1.11               | 0.06           | 70                                            | 6                           | 12.20%             |
| NP_006421     | IPI00302927              | T-complex protein 1, delta subunit                                | 1.10               | 0.06           | 23                                            | 4                           | 8.55%              |
| NP_001681     | IPI00007682              | Vacuolar ATP synthase catalytic subunit A, ubiquitous isoform     | 1.11               | 0.07           | 21                                            | 2                           | 3.40%              |
| NP_002793     | IPI00011126              | 26S protease regulatory subunit 4                                 | 1.09               | 0.06           | 8                                             | 3                           | 7.50%              |
| NP_001023     | IPI00182289              | 40S ribosomal protein S29                                         | 1.18               | 0.06           | 48                                            | 3                           | 34.60%             |
| NP_001001     | IPI00021840              | 40S ribosomal protein S6                                          | 0.87               | 0.10           | 3                                             | 2                           | 8.84%              |
| NP_001012321  | IPI00553164              | 40S ribosomal protein SA                                          | 1.14               | 0.02           | 20                                            | 5                           | 28.20%             |
| NP_000995     | IPI00008529              | 60S acidic ribosomal protein P2                                   | 1.21               | 0.03           | 30                                            | 4                           | 69.60%             |
| NP_000970     | IPI00215719              | 60S ribosomal protein L18                                         | 0.76               | 0.03           | 8                                             | 2                           | 13.40%             |
| NP_000678.1   | IPI00646823              | Adenosylhomocysteinase                                            | 1.13               | 0.06           | 9                                             | 2                           | 3.95%              |
| NP_004930     | IPI00293655              | ATP-dependent RNA helicase DDX1                                   | 1.16               | 0.09           | 6                                             | 4                           | 2.43%              |
| NP_006308     | IPI00299024              | Brain acid soluble protein 1                                      | 1.12               | 0.07           | 40                                            | 9                           | 69.50%             |
| NP_004359     | IPI00015262, IPI00398735 | Calponin-2                                                        | 1.12               | 0.03           | 5                                             | 2                           | 9.42%              |
| NP_001312     | IPI00002824              | Cysteine and glycine-rich protein 2                               | 1.14               | 0.08           | 13                                            | 2                           | 16.10%             |
| NP_001377     | IPI00257508              | Dihydropyrimidinase-related protein 2                             | 1.17               | 0.09           | 4                                             | 4                           | 8.92%              |
| NP_004517     | IPI00184330              | DNA replication licensing factor MCM2                             | 1.11               | 0.10           | 20                                            | 4                           | 3.98%              |
| NP_001378     | IPI00029111              | DPYSL3 protein                                                    | 1.21               | 0.00           | 31                                            | 6                           | 11.40%             |
| NP_002746     | IPI00219604              | Dual specificity mitogen-activated protein kinase kinase 1        | 1.15               | 0.10           | 2                                             | 2                           | 5.87%              |
| NP_001395     | IPI00000875, IPI00640222 | Elongation factor 1-gamma                                         | 1.11               | 0.09           | 50                                            | 7                           | 19.30%             |
| NP_003741     | IPI00029012              | Eukaryotic translation initiation factor 3 subunit 10             | 1.21               | 0.01           | 4                                             | 3                           | 2.82%              |
| NP_001559     | IPI00013068              | Eukaryotic translation initiation factor 3 subunit 6              | 1.12               | 0.02           | 2                                             | 2                           | 6.07%              |
| NP_071496     | IPI00014263, IPI00220894 | Eukaryotic translation initiation factor 4H isoform 1             | 1.23               | 0.09           | 8                                             | 2                           | 12.90%             |
| NP_004095.4   | IPI00026781              | Fatty acid synthase                                               | 1.14               | 0.05           | 6                                             | 3                           | 8.92%              |

\* % Coverage = the # of amino acids in all unique peptides identified with 1 % FPR divided by the total # of amino acids in the protein listed. This is the largest % coverage identified for all three search algorithm identifications.

| <u>RefSeq</u>  | <u>IPI</u>                                            | <u>Protein Name</u>                                                                        | <u>Fold Change</u> | <u>p-value</u> | <u># of spectra utilized for quantitation</u> | <u># of unique peptides</u> | <u>% Coverage*</u> |
|----------------|-------------------------------------------------------|--------------------------------------------------------------------------------------------|--------------------|----------------|-----------------------------------------------|-----------------------------|--------------------|
| NP_005511.1    | IPI00013881                                           | Heterogeneous nuclear ribonucleoprotein H1                                                 | 0.89               | 0.09           | 2                                             | 2                           | 33.40%             |
| NP_055121      | IPI00550689                                           | HSPC117 protein                                                                            | 1.10               | 0.08           | 29                                            | 3                           | 6.93%              |
| NP_001001521.1 | IPI00329331                                           | Hypothetical protein UGP2                                                                  | 1.12               | 0.03           | 22                                            | 5                           | 15.80%             |
| NP_005919      | IPI00002236, IPI00334005                              | Lactadherin precursor                                                                      | 1.18               | 0.04           | 15                                            | 3                           | 12.50%             |
| NP_002297      | IPI00465431, IPI00556088                              | LGALS3 protein                                                                             | 1.24               | 0.05           | 10                                            | 3                           | 16.00%             |
| NP_004981      | IPI00008240                                           | Methionyl-tRNA synthetase                                                                  | 1.13               | 0.02           | 17                                            | 3                           | 5.00%              |
| NP_060530      | IPI00017283                                           | Mitochondrial isoleucine tRNA synthetase                                                   | 1.11               | 0.05           | 3                                             | 2                           | 2.37%              |
| NP_006443      | IPI00217223                                           | Multifunctional protein ADE2                                                               | 1.18               | 0.01           | 3                                             | 2                           | 7.10%              |
| NP_057306      | IPI00007208, IPI00643084                              | Probable ATP-dependent RNA helicase DDX41                                                  | 1.25               | 0.02           | 2                                             | 2                           | 5.31%              |
| NP_004388      | IPI00030320, IPI00556000                              | Probable ATP-dependent RNA helicase DDX6                                                   | 1.13               | 0.09           | 20                                            | 4                           | 11.00%             |
| NP_005745      | IPI00012442                                           | Ras-GTPase-activating protein binding protein 1                                            | 1.11               | 0.00           | 87                                            | 7                           | 23.80%             |
| NP_005902      | IPI00010157                                           | S-adenosylmethionine synthetase gamma form                                                 | 1.13               | 0.09           | 2                                             | 2                           | 5.06%              |
| NP_006504      | IPI00220637, IPI00514587                              | Seryl-tRNA synthetase<br>Splice Isoform 1 of Cullin-associated NEDD8-dissociated protein 1 | 1.08               | 0.00           | 7                                             | 2                           | 4.68%              |
| NP_060918      | IPI00100160                                           | Splice Isoform 1 of Enabled protein homolog                                                | 1.18               | 0.08           | 11                                            | 4                           | 5.12%              |
| NP_001008493   | IPI00411623                                           | Splice Isoform 1 of Filamin-B                                                              | 1.10               | 0.02           | 15                                            | 3                           | 6.26%              |
| NP_001448      | IPI00289334                                           | Splice Isoform 1 of Hematological and neurological expressed 1-like protein                | 1.16               | 0.00           | 17                                            | 5                           | 7.80%              |
| NP_653171      | IPI00607884                                           | Splice Isoform 2 of WD-repeat protein 1                                                    | 1.24               | 0.03           | 2                                             | 2                           | 8.95%              |
| NP_005103.2    | IPI00216256                                           | Splice Isoform A of Ras-GTPase-activating protein binding protein 2                        | 1.21               | 0.08           | 6                                             | 4                           | 9.94%              |
| NP_036429      | IPI00009057                                           | Splice Isoform Crk-II of Proto-oncogene C-crk                                              | 1.13               | 0.05           | 10                                            | 2                           | 4.56%              |
| NP_058431      | IPI00004838, IPI00399054<br>IPI00015029, IPI00479875, | Telomerase-binding protein p23                                                             | 1.18               | 0.04           | 4                                             | 2                           | 5.26%              |
| NP_006592      | IPI00656118                                           | Thioredoxin                                                                                | 1.09               | 0.04           | 8                                             | 2                           | 16.90%             |
| NP_003320      | IPI00216298                                           | Tryptophanyl-tRNA synthetase                                                               | 1.13               | 0.07           | 31                                            | 3                           | 28.90%             |
| NP_004175      | IPI00295400                                           | Ubiquitin carboxyl-terminal hydrolase 10                                                   | 1.12               | 0.02           | 11                                            | 3                           | 6.79%              |
| NP_005144      | IPI00291946                                           | Ubiquitin carboxyl-terminal hydrolase isozyme L1                                           | 1.12               | 0.02           | 8                                             | 3                           | 4.73%              |
| NP_004172      | IPI00018352                                           | WUGSC:H RG054D04.1 protein                                                                 | 1.14               | 0.03           | 26                                            | 5                           | 29.60%             |
| NP_000962      | IPI00011457, IPI00030179,<br>IPI00398699, IPI00472171 |                                                                                            | 0.88               | 0.08           | 2                                             | 2                           | 11.70%             |

\* % Coverage = the # of amino acids in all unique peptides identified with 1 % FPR divided by the total # of amino acids in the protein listed. This is the largest % coverage identified for all three search algorithm identifications.
