# Supplementary material
Source: PubMed Central journal article supplement (PMC2401335)
Supplement: M700399-MCP200_3.pdf [file M700399-MCP200_3.pdf]

**Supplementary Table 2:** Listing of proteins identified in global proteomics experiments with high confidence and differential expression,  $\leq / \geq 10\%$ ,  $p \leq 0.1$ , after exposure to BMP4 protein.

| <u>RefSeq</u> | <u>IPI</u>                            | <u>Protein Name</u>                                                    | <u>Fold Change</u> | <u>p-value</u> | <u># of spectra utilized for quantification</u> | <u># of unique peptides</u> | <u>% Coverage*</u> |
|---------------|---------------------------------------|------------------------------------------------------------------------|--------------------|----------------|-------------------------------------------------|-----------------------------|--------------------|
| NP_002148     | IPI00220362                           | 10 kDa heat shock protein, mitochondrial                               | 0.74               | 0.00           | 14                                              | 4                           | 29.70%             |
| NP_006102     | IPI00001539                           | 3-ketoacyl-CoA thiolase, mitochondrial                                 | 0.81               | 0.03           | 10                                              | 3                           |                    |
|               | IPI00472102                           | 60 kDa heat shock protein, mitochondrial precursor                     | 0.74               | 0.00           | 144                                             | 15                          | 42.10%             |
| NP_000007     | IPI00005040, IPI00513827              | Acyl-CoA dehydrogenase, medium-chain specific, mitochondrial precursor | 1.13               | 0.04           | 6                                               | 2                           | 5.70%              |
| NP_005754     | IPI00033217                           | Alpha-aminoadipic semialdehyde synthase, mitochondrial precursor       | 0.54               | 0.00           | 25                                              | 7                           | 10.20%             |
| NP_001001937  | IPI00440493                           | ATP synthase alpha chain, mitochondrial precursor                      | 0.85               | 0.03           | 45                                              | 4                           | 11.40%             |
| NP_001677     | IPI00303476                           | ATP synthase beta chain, mitochondrial precursor                       | 0.87               | 0.01           | 79                                              | 12                          | 33.60%             |
| NP_006467     | IPI00027448                           | ATP synthase g chain, mitochondrial                                    | 0.91               | 0.02           | 14                                              | 2                           | 23.30%             |
| NP_005989     | IPI00290770, IPI00553185              | Chaperonin Containing TCPI, subunit 3 isoform b                        | 0.82               | 0.06           | 16                                              | 6                           | 14.30%             |
| NP_003312     | IPI00027107                           | Elongation factor Tu, mitochondrial precursor                          | 0.88               | 0.08           | 54                                              | 6                           | 19.90%             |
| NP_057376     | IPI00030275, IPI00646055              | Heat shock protein 75 kDa, mitochondrial precursor                     | 0.79               | 0.02           | 15                                              | 5                           | 8.67%              |
| XP_944625.1   | IPI00554788                           | Keratin, type I cytoskeletal 18                                        | 2.89               | 0.00           | 80                                              | 19                          | 55.20%             |
| NP_002264     | IPI00554648                           | Keratin, type II cytoskeletal 8                                        | 3.48               | 0.00           | 115                                             | 23                          | 49.80%             |
| NP_004541     | IPI00025239                           | NADH-ubiquinone oxidoreductase 49 kDa subunit, mitochondrial precursor | 0.87               | 0.10           | 11                                              | 2                           | 5.83%              |
| NP_000265     | IPI00022334                           | Ornithine aminotransferase, mitochondrial precursor                    | 1.14               | 0.07           | 16                                              | 2                           | 5.92%              |
| NP_036531     | IPI00334907, IPI00395939              | PhosPhatidylinositol transfer Protein, beta                            | 1.23               | 0.09           | 3                                               | 2                           | 6.62%              |
| NP_005403     | IPI00002520                           | Serine hydroxymethyltransferase, mitochondrial precursor               | 0.83               | 0.05           | 3                                               | 3                           | 7.74%              |
| NP_003134     | IPI00029744                           | Single-stranded DNA-binding protein, mitochondrial precursor           | 0.76               | 0.00           | 11                                              | 2                           | 16.20%             |
| NP_006507     | IPI00220194, IPI00641837              | Solute carrier family 2, facilitated glucose transporter member 1      | 1.60               | 0.10           | 22                                              | 2                           | 3.60%              |
| NP_008862     | IPI00003909, IPI00152505, IPI00607720 | Solute carrier family 2, facilitated glucose transporter member 3      | 3.05               | 0.03           | 5                                               | 2                           | 5.58%              |
| NP_001026854  | IPI00003377, IPI00215907, IPI00332419 | Splice Isoform 1 of Splicing factor, arginine/serine-rich 7            | 0.88               | 0.01           | 48                                              | 2                           | 7.56%              |
| NP_003760     | IPI00012340                           | Splicing factor, arginine/serine-rich 9                                | 0.83               | 0.04           | 12                                              | 2                           | 9.96%              |
| NP_004125     | IPI00007765                           | Stress-70 protein, mitochondrial precursor                             | 0.78               | 0.01           | 22                                              | 11                          | 20.50%             |
| NP_036205     | IPI00010720                           | T-complex protein 1, epsilon subunit                                   | 0.88               | 0.03           | 23                                              | 5                           | 12.60%             |
| NP_006576.2   | IPI00302925                           | T-complex protein 1, theta subunit                                     | 0.85               | 0.01           | 17                                              | 6                           | 10.90%             |

\* % Coverage = the # of amino acids in all unique peptides identified with 1 % FPR divided by the total # of amino acids in the protein listed. This is the largest % coverage identified for all three search algorithm identifications.

| <u>RefSeq</u> | <u>IPI</u>                                                   | <u>Protein Name</u>                                                            | <u>Fold Change</u> | <u>p-value</u> | <u># of spectra utilized for quantification</u> | <u># of unique peptides</u> | <u>% Coverage*</u> |
|---------------|--------------------------------------------------------------|--------------------------------------------------------------------------------|--------------------|----------------|-------------------------------------------------|-----------------------------|--------------------|
| NP_689508     | IPI00329633                                                  | Threonyl-tRNA synthetase, cytoplasmic                                          | 0.61               | 0.04           | 19                                              | 5                           | 6.36%              |
|               | IPI00477182, IPI00556118                                     | 122 kDa protein                                                                | 0.86               | 0.09           | 11                                              | 7                           | 7.08%              |
| NP_001002857  | IPI00413331,<br>IPI00418169, IPI00455315                     | 36 kDa protein                                                                 | 1.77               | 0.00           | 16                                              | 5                           | 17.60%             |
| NP_001013454  | IPI00165360                                                  | 3-mercaptopyruvate sulfurtransferase                                           | 1.19               | 0.04           | 3                                               | 2                           | 7.10%              |
| NP_001008     | IPI00221089                                                  | 40S ribosomal protein S13                                                      | 0.89               | 0.09           | 35                                              | 5                           | 31.30%             |
| NP_072045     | IPI00013296                                                  | 40S ribosomal protein S18                                                      | 0.82               | 0.10           | 18                                              | 3                           | 15.80%             |
| NP_000996     | IPI00011253                                                  | 40S ribosomal protein S3                                                       | 0.79               | 0.03           | 8                                               | 3                           | 16.00%             |
| NP_000997     | IPI00419880, IPI00472119                                     | 40S ribosomal protein S3a                                                      | 0.86               | 0.07           | 68                                              | 6                           | 20.20%             |
| NP_001001     | IPI00021840                                                  | 40S ribosomal protein S6                                                       | 0.76               | 0.09           | 3                                               | 2                           | 8.84%              |
| NP_001002     | IPI00013415                                                  | 40S ribosomal protein S7                                                       | 0.87               | 0.02           | 20                                              | 3                           | 20.10%             |
| NP_001004     | IPI00221088                                                  | 40S ribosomal protein S9                                                       | 0.88               | 0.02           | 44                                              | 7                           | 28.00%             |
|               | IPI00027493,<br>IPI00554481,<br>IPI00554611,<br>IPI00554702, |                                                                                |                    |                |                                                 |                             | 24.40%             |
| NP_001013269  | IPI00554722, IPI00604710                                     | 4F2 cell-surface antigen heavy chain                                           | 1.15               | 0.03           | 106                                             | 11                          |                    |
| NP_006004     | IPI00554723, IPI00646899                                     | 60S ribosomal protein L10                                                      | 0.89               | 0.07           | 61                                              | 5                           | 31.00%             |
| NP_002939     | IPI00470528, IPI00550032                                     | 60S ribosomal protein L15                                                      | 0.86               | 0.03           | 80                                              | 7                           | 29.60%             |
|               | IPI00413324,<br>IPI00478208,                                 | 60S ribosomal protein L17                                                      | 0.85               | 0.05           | 21                                              | 3                           | 17.50%             |
| NP_000976     | IPI00514874, IPI00644171                                     |                                                                                |                    |                |                                                 |                             |                    |
| NP_000970     | IPI00215719                                                  | 60S ribosomal protein L18                                                      | 0.67               | 0.01           | 8                                               | 2                           | 13.40%             |
| NP_000971     | IPI00026202, IPI00176629                                     | 60S ribosomal protein L18a                                                     | 0.81               | 0.03           | 55                                              | 6                           | 24.40%             |
| NP_000977     | IPI00306332                                                  | 60S ribosomal protein L24                                                      | 0.86               | 0.05           | 17                                              | 2                           |                    |
| NP_000987     | IPI00029731                                                  | 60S ribosomal protein L35a                                                     | 0.81               | 0.09           | 15                                              | 2                           | 17.30%             |
| NP_000961     | IPI00329389                                                  | 60S ribosomal protein L6                                                       | 0.82               | 0.04           | 9                                               | 3                           | 13.20%             |
|               | IPI00299573,<br>IPI00397676, IPI00479315                     | 60S ribosomal protein L7a                                                      | 0.91               | 0.01           | 10                                              | 2                           | 9.81%              |
| NP_001093     | IPI00013508                                                  | Alpha-actinin 1                                                                | 1.25               | 0.00           | 64                                              | 14                          | 16.30%             |
| NP_004915     | IPI00013808                                                  | Alpha-actinin 4                                                                | 1.38               | 0.00           | 59                                              | 14                          | 16.80%             |
| NP_000691     | IPI00218918, IPI00549413                                     | Annexin A1                                                                     | 1.65               | 0.04           | 2                                               | 2                           | 11.60%             |
| NP_001145     | IPI00329801                                                  | Annexin A5                                                                     | 1.18               | 0.03           | 29                                              | 6                           | 27.00%             |
| NP_066964     | IPI00220834                                                  | ATP-dependent DNA helicase II 80 kDa subunit                                   | 0.88               | 0.05           | 118                                             | 16                          | 25.00%             |
| NP_005520     | IPI00024284                                                  | Basement membrane-specific heparan sulfate proteoglycan core protein precursor | 1.50               | 0.01           | 4                                               | 4                           | 1.30%              |

\* % Coverage = the # of amino acids in all unique peptides identified with 1 % FPR divided by the total # of amino acids in the protein listed. This is the largest % coverage identified for all three search algorithm identifications.

| <u>RefSeq</u> | <u>IPI</u>                                                               | <u>Protein Name</u>                                        | <u>Fold Change</u> | <u>p-value</u> | <u># of spectra utilized for quantification</u> | <u># of unique peptides</u> | <u>% Coverage*</u> |
|---------------|--------------------------------------------------------------------------|------------------------------------------------------------|--------------------|----------------|-------------------------------------------------|-----------------------------|--------------------|
| NP_006308     | IPI00299024                                                              | Brain acid soluble protein 1                               | 1.57               | 0.00           | 40                                              | 9                           | 69.50%             |
| NP_005611     | IPI00013895, IPI00029574                                                 | Calcizzarin                                                | 3.18               | 0.08           | 3                                               | 2                           | 25.70%             |
| NP_004369     | IPI00219930                                                              | Cellular retinoic acid binding protein 1                   | 0.61               | 0.01           | 9                                               | 3                           | 16.90%             |
| NP_001279     | IPI00010896,<br>IPI00554767,<br>IPI00640548,<br>IPI00646484, IPI00647593 | Chloride intracellular channel protein 1                   | 1.09               | 0.03           | 22                                              | 3                           | 10.80%             |
| NP_001814     | IPI00022977                                                              | Creatine kinase B-type                                     | 0.72               | 0.01           | 11                                              | 5                           | 17.30%             |
| NP_001312     | IPI00002824                                                              | Cysteine and glycine-rich protein 2                        | 0.64               | 0.09           | 13                                              | 2                           | 16.10%             |
| NP_061820     | IPI00465315                                                              | Cytochrome c                                               | 0.82               | 0.01           | 60                                              | 3                           | 25.00%             |
| NP_004146     | IPI00032139                                                              | Cytoplasmic antiproteinase 3                               | 2.07               | 0.00           | 16                                              | 7                           | 23.10%             |
| NP_112487     | IPI00009922                                                              | DC50                                                       | 0.80               | 0.08           | 43                                              | 2                           | 20.20%             |
| NP_001377     | IPI00257508                                                              | Dihydropyrimidinase-related protein 2                      | 0.72               | 0.00           | 4                                               | 4                           | 8.92%              |
| NP_001805     | IPI00022810                                                              | Dipeptidyl-peptidase I precursor                           | 0.80               | 0.00           | 49                                              | 5                           | 11.50%             |
| NP_004517     | IPI00184330                                                              | DNA replication licensing factor MCM2                      | 0.78               | 0.01           | 20                                              | 4                           | 3.98%              |
| NP_002379     | IPI00013214                                                              | DNA replication licensing factor MCM3                      | 0.79               | 0.07           | 5                                               | 4                           | 5.94%              |
| NP_005905     | IPI00018349                                                              | DNA replication licensing factor MCM4                      | 0.85               | 0.02           | 16                                              | 6                           | 8.34%              |
| NP_006730     | IPI00018350                                                              | DNA replication licensing factor MCM5                      | 0.81               | 0.05           | 6                                               | 4                           | 7.08%              |
| NP_005906     | IPI00031517                                                              | DNA replication licensing factor MCM6                      | 0.82               | 0.01           | 22                                              | 6                           | 8.53%              |
| NP_001378     | IPI00029111                                                              | DPYSL3 protein                                             | 0.71               | 0.00           | 31                                              | 6                           | 11.40%             |
| NP_004386     | IPI00003406                                                              | Drebrin                                                    | 0.79               | 0.04           | 7                                               | 4                           | 6.94%              |
| NP_002746     | IPI00219604                                                              | Dual specificity mitogen-activated protein kinase kinase 1 | 1.22               | 0.09           | 2                                               | 2                           | 5.87%              |
| NP_001952     | IPI00186290                                                              | Elongation factor 2                                        | 0.84               | 0.00           | 133                                             | 20                          | 26.60%             |
| NP_001559     | IPI00013068                                                              | Eukaryotic translation initiation factor 3 subunit 6       | 1.14               | 0.09           | 2                                               | 2                           | 6.07%              |
| NP_003370     | IPI00479359                                                              | Ezrin                                                      | 1.69               | 0.00           | 105                                             | 12                          | 19.00%             |
| NP_001427     | IPI00025039                                                              | Fibrillarin                                                | 0.78               | 0.01           | 80                                              | 6                           | 24.60%             |
| NP_002005     | IPI00219005                                                              | FK506-binding protein 4                                    | 0.83               | 0.05           | 22                                              | 5                           | 17.50%             |
| NP_036525.1   | IPI00465260                                                              | GARS protein                                               | 0.83               | 0.10           | 13                                              | 4                           | 6.26%              |
| NP_000166     | IPI00027497                                                              | Glucose-6-phosphate isomerase                              | 0.87               | 0.08           | 16                                              | 5                           | 10.20%             |
| NP_000843     | IPI00219757                                                              | Glutathione S-transferase P                                | 0.91               | 0.09           | 72                                              | 7                           | 45.00%             |
| NP_004823     | IPI00019755, IPI00642936                                                 | Glutathione transferase omega 1                            | 1.73               | 0.02           | 4                                               | 2                           | 7.47%              |
| NP_002037     | IPI00219018                                                              | Glyceraldehyde-3-phosphate dehydrogenase                   | 0.85               | 0.00           | 130                                             | 11                          | 45.80%             |
| NP_001439     | IPI00232571                                                              | Glypican-4 precursor                                       | 0.59               | 0.06           | 23                                              | 2                           | 5.58%              |
| NP_006316     | IPI00012507, IPI00643041                                                 | GTP-binding nuclear protein RAN                            | 0.84               | 0.02           | 32                                              | 7                           | 28.90%             |
| NP_001017963  | IPI00382470                                                              | Heat shock protein HSP 90-alpha 2                          | 0.90               | 0.03           | 167                                             | 22                          | 29.20%             |

\* % Coverage = the # of amino acids in all unique peptides identified with 1 % FPR divided by the total # of amino acids in the protein listed. This is the largest % coverage identified for all three search algorithm identifications.

| <u>RefSeq</u>  | <u>IPI</u>                               | <u>Protein Name</u>                                   | <u>Fold Change</u> | <u>p-value</u> | <u># of spectra utilized for quantification</u> | <u># of unique peptides</u> | <u>% Coverage*</u> |
|----------------|------------------------------------------|-------------------------------------------------------|--------------------|----------------|-------------------------------------------------|-----------------------------|--------------------|
| NP_031381      | IPI00334775, IPI00414676                 | Heat shock protein HSP 90-beta                        | 0.80               | 0.00           | 215                                             | 28                          | 43.90%             |
| NP_003474      | IPI00005996                              | High mobility group protein HMGI-C                    | 0.90               | 0.09           | 17                                              | 4                           | 41.30%             |
| NP_254280      | IPI00031562,<br>IPI00255316, IPI00303315 | Histone H2A                                           | 0.81               | 0.03           | 96                                              | 3                           | 24.60%             |
| NP_778235      | IPI00216730                              | Histone H2A                                           | 0.82               | 0.00           | 35                                              | 4                           | 27.10%             |
| NP_003510      | IPI00018534,                             | Histone H2B.c                                         | 0.90               | 0.07           | 183                                             | 7                           | 48.00%             |
| NP_003519      | IPI00003935                              | Histone H2B.q                                         | 0.87               | 0.02           | 24                                              | 2                           | 20.80%             |
| NP_001005464   | IPI00171611                              | Histone H3                                            | 0.92               | 0.07           | 11                                              | 2                           | 13.20%             |
| NP_524147      | IPI00413922                              | Hypothetical protein                                  | 1.23               | 0.05           | 15                                              | 7                           | 63.60%             |
| NP_997647      | IPI00339227                              | Hypothetical protein DKFZp686O1166                    | 2.84               | 0.00           | 147                                             | 23                          | 12.00%             |
| NP_078950      | IPI00002948                              | Hypothetical protein FLJ12457                         | 0.81               | 0.01           | 33                                              | 5                           | 28.70%             |
| NP_001001521.1 | IPI00329331                              | Hypothetical protein UGP2                             | 0.69               | 0.00           | 22                                              | 5                           | 15.80%             |
| NP_002257      | IPI00002214                              | Importin alpha-2 subunit                              | 0.65               | 0.05           | 12                                              | 2                           | 5.86%              |
| NP_002262.3    | IPI00329200                              | Importin beta-3                                       | 0.81               | 0.07           | 4                                               | 2                           | 1.91%              |
| NP_002221      | IPI00554711                              | Junction plakoglobin                                  | 1.58               | 0.03           | 20                                              | 4                           | 8.75%              |
| NP_058642      | IPI00001754,<br>IPI00069985, IPI00294993 | Junctional adhesion molecule A precursor              | 1.39               | 0.01           | 13                                              | 2                           | 12.70%             |
| NP_002267      | IPI00479145                              | Keratin 19                                            | 3.57               | 0.00           | 198                                             | 19                          | 57.00%             |
| NP_002264.1    | IPI00418411                              | Keratin 8 variant                                     | 3.45               | 0.00           | 107                                             | 23                          | 56.10%             |
| NP_002297      | IPI00465431, IPI00556088                 | LGALS3 protein                                        | 1.49               | 0.05           | 10                                              | 3                           | 16.00%             |
| NP_002291      | IPI00219217                              | L-lactate dehydrogenase B chain                       | 0.83               | 0.00           | 32                                              | 7                           | 21.60%             |
| NP_002323      | IPI00020557                              | Low-density lipoprotein receptor                      | 1.25               | 0.01           | 3                                               | 2                           | 0.73%              |
| NP_002289      | IPI00010471                              | L-plastin                                             | 2.18               | 0.01           | 7                                               | 4                           | 6.38%              |
| NP_075385      | IPI00641181                              | MARCKS-related protein                                | 0.85               | 0.03           | 8                                               | 3                           | 32.00%             |
| NP_006658      | IPI00220739                              | Membrane associated progesterone receptor component 1 | 0.86               | 0.08           | 15                                              | 2                           | 7.73%              |
| NP_060530      | IPI00017283, IPI00181469                 | Mitochondrial isoleucine tRNA synthetase              | 1.17               | 0.09           | 3                                               | 2                           | 2.37%              |
| NP_002435      | IPI00219365                              | Moesin                                                | 1.70               | 0.03           | 6                                               | 2                           | 3.47%              |
| NP_006294      | IPI00011916                              | Multisynthetase complex auxiliary component p38       | 0.82               | 0.04           | 2                                               | 2                           | 5.00%              |
| NP_291024      | IPI00033494,<br>IPI00220573, IPI00604523 | Myosin regulatory light chain                         | 1.28               | 0.06           | 7                                               | 2                           | 16.30%             |
| NP_002464      | IPI00019502                              | Myosin-9                                              | 1.34               | 0.00           | 53                                              | 13                          | 7.66%              |
| NP_006608      | IPI00513769                              | Nestin                                                | 0.72               | 0.03           | 8                                               | 3                           | 2.84%              |
| NP_001611      | IPI00021812                              | Neuroblast differentiation-associated protein AHNAK   | 3.44               | 0.01           | 8                                               | 3                           | 0.85%              |
| NP_055113      | IPI00300086                              | Nicotinate-nucleotide pyrophosphorylase               | 1.26               | 0.03           | 19                                              | 3                           | 11.80%             |
| NP_001018146   | IPI00604590                              | NME2 protein                                          | 0.83               | 0.03           | 45                                              | 4                           | 16.80%             |

\* % Coverage = the # of amino acids in all unique peptides identified with 1 % FPR divided by the total # of amino acids in the protein listed. This is the largest % coverage identified for all three search algorithm identifications.

| <u>RefSeq</u> | <u>IPI</u>                               | <u>Protein Name</u>                          | <u>Fold Change</u> | <u>p-value</u> | <u># of spectra utilized for quantification</u> | <u># of unique peptides</u> | <u>% Coverage*</u> |
|---------------|------------------------------------------|----------------------------------------------|--------------------|----------------|-------------------------------------------------|-----------------------------|--------------------|
| NP_004550     | IPI00031812, IPI00643351                 | Nuclease sensitive element binding protein 1 | 0.73               | 0.00           | 34                                              | 6                           | 22.20%             |
| NP_004732     | IPI00292387                              | Nucleolar and coiled-body phosphoprotein 1   | 0.61               | 0.00           | 66                                              | 9                           | 13.70%             |
| NP_005372.2   | IPI00604620                              | Nucleolin                                    | 0.63               | 0.05           | 24                                              | 13                          | 18.20%             |
| NP_005959     | IPI00171903, IPI00383296                 | ORF protein                                  | 0.90               | 0.03           | 88                                              | 15                          | 26.30%             |
| NP_653080     | IPI00217683,<br>IPI00237884, IPI00479064 | OTTHUMP00000017427                           | 0.82               | 0.01           | 5                                               | 4                           | 2.73%              |
| NP_004593     | IPI00218609,                             | OTTHUMP00000031235                           | 0.80               | 0.06           | 16                                              | 2                           | 6.86%              |
| NP_066953     | IPI00419585                              | Peptidyl-prolyl cis-trans isomerase A        | 0.81               | 0.02           | 24                                              | 7                           | 58.50%             |
| NP_002565     | IPI00000874                              | Peroxiredoxin 1                              | 0.88               | 0.03           | 83                                              | 9                           | 53.30%             |
| NP_004896     | IPI00220301                              | Peroxiredoxin 6                              | 0.82               | 0.03           | 17                                              | 8                           | 48.90%             |
| NP_002558     | IPI00219446                              | Phosphatidylethanolamine-binding protein     | 0.80               | 0.01           | 13                                              | 3                           | 21.00%             |
| NP_005388     | IPI00299116, IPI00604773                 | Podocalyxin-like protein 1 precursor         | 0.64               | 0.01           | 4                                               | 3                           | 5.30%              |
| NP_001609     | IPI00449049                              | Poly [ADP-ribose] polymerase 1               | 0.85               | 0.04           | 19                                              | 5                           | 6.81%              |
| NP_005007     | IPI00012066                              | Poly(rC)-binding protein 2, isoform b        | 0.83               | 0.03           | 8                                               | 4                           | 21.60%             |
| NP_002943.2]  | IPI00455532, IPI00479366                 | PREDICTED: similar to ribosomal protein S2   | 0.87               | 0.00           | 11                                              | 3                           | 11.40%             |
| NP_055555     | IPI00009328                              | Probable ATP-dependent RNA helicase DDX48    | 0.90               | 0.09           | 78                                              | 4                           | 11.70%             |
| NP_004387     | IPI00017617                              | Probable ATP-dependent RNA helicase DDX5     | 0.84               | 0.02           | 13                                              | 5                           | 11.70%             |
| NP_005013     | IPI00216691                              | Profilin-1                                   | 0.89               | 0.02           | 74                                              | 6                           | 44.60%             |
| NP_002625     | IPI00017334                              | Prohibitin                                   | 0.78               | 0.02           | 30                                              | 3                           | 18.40%             |
| NP_009204     | IPI00027252                              | Prohibitin-2                                 | 0.87               | 0.02           | 18                                              | 4                           | 18.70%             |
| NP_003463     | IPI00020021                              | Protein DEK                                  | 0.68               | 0.04           | 14                                              | 2                           | 5.33%              |
| NP_005304     | IPI00025252                              | Protein disulfide-isomerase A3 precursor     | 0.84               | 0.05           | 69                                              | 18                          | 38.40%             |
| NP_000909     | IPI00010796                              | Protein disulfide-isomerase precursor        | 1.16               | 0.04           | 64                                              | 11                          | 23.40%             |
| NP_061185     | IPI00465044                              | Protein RCC2                                 | 0.79               | 0.08           | 43                                              | 4                           | 9.00%              |
| NP_000261     | IPI00017672                              | Purine nucleoside phosphorylase              | 1.16               | 0.06           | 6                                               | 2                           | 11.80%             |
| NP_002873     | IPI00414127                              | Ran-specific GTPase-activating protein       | 0.86               | 0.03           | 5                                               | 2                           | 15.90%             |
| NP_112243     | IPI00008964                              | Ras-related protein Rab-1B                   | 1.24               | 0.05           | 7                                               | 4                           | 20.90%             |
| NP_002892     | IPI00015842                              | Reticulocalbin-1 precursor                   | 1.29               | 0.03           | 7                                               | 2                           | 9.67%              |
| NP_005398     | IPI00144003                              | Sal-like protein 2                           | 0.77               | 0.04           | 12                                              | 2                           | 1.29%              |
| NP_055464     | IPI00005648                              | Scaffold attachment factor B2                | 0.92               | 0.05           | 7                                               | 3                           | 5.14%              |
| NP_004850.1   | IPI00024067, IPI00455383<br>IPI00034283, | Similar to Clathrin heavy chain              | 1.13               | 0.02           | 37                                              | 17                          | 13.90%             |
| NP_115914     | IPI00641706,<br>IPI00643158, IPI00646779 | Similar to Tubulin beta-5 chain              | 0.84               | 0.00           | 122                                             | 9                           | 24.70%             |
| NP_001895     | IPI00017292                              | Splice Isoform 1 of Beta-catenin             | 1.29               | 0.00           | 33                                              | 5                           | 10.90%             |

\* % Coverage = the # of amino acids in all unique peptides identified with 1 % FPR divided by the total # of amino acids in the protein listed. This is the largest % coverage identified for all three search algorithm identifications.

| <u>RefSeq</u> | <u>IPI</u>                                                                               | <u>Protein Name</u>                                                         | <u>Fold Change</u> | <u>p-value</u> | <u># of spectra utilized for quantification</u> | <u># of unique peptides</u> | <u>% Coverage*</u> |
|---------------|------------------------------------------------------------------------------------------|-----------------------------------------------------------------------------|--------------------|----------------|-------------------------------------------------|-----------------------------|--------------------|
| NP_149129     | IPI00014516,<br>IPI00218694,<br>IPI00218695,<br>IPI00218696, IPI00333771<br>IPI00010415, | Splice Isoform 1 of Caldesmon                                               | 1.37               | 0.00           | 20                                              | 3                           | 9.02%              |
| NP_863654     | IPI00219452,<br>IPI00395469,<br>IPI00395748, IPI00413603                                 | Splice Isoform 1 of Cytosolic acyl coenzyme A thioester hydrolase           | 0.84               | 0.04           | 4                                               | 2                           | 8.16%              |
| NP_005907     | IPI00299904                                                                              | Splice Isoform 1 of DNA replication licensing factor MCM7                   | 0.85               | 0.07           | 14                                              | 3                           | 5.70%              |
| NP_001102     | IPI00394665,<br>IPI00394668,                                                             | Splice Isoform 1 of Double-stranded RNA-specific adenosine deaminase        | 0.84               | 0.07           | 18                                              | 4                           | 4.73%              |
| NP_001008493  | IPI00411623<br>IPI00289334,<br>IPI00382696,                                              | Splice Isoform 1 of Enabled protein homolog                                 | 0.85               | 0.02           | 15                                              | 3                           | 6.26%              |
| NP_001448     | IPI00382697,<br>IPI00382700,<br>IPI00477536, IPI00480131                                 | Splice Isoform 1 of Filamin-B                                               | 1.28               | 0.00           | 97                                              | 17                          | 7.80%              |
| XP_499363.2   | IPI00178352, IPI00413958                                                                 | Splice Isoform 1 of Filamin-C                                               | 1.16               | 0.07           | 27                                              | 7                           | 3.23%              |
| NP_006588     | IPI00003865                                                                              | Splice Isoform 1 of Heat shock cognate 71 kDa protein                       | 0.84               | 0.00           | 201                                             | 20                          | 39.90%             |
| NP_653171     | IPI00027397,<br>IPI00607796, IPI00607884<br>IPI00028888,<br>IPI00220683,                 | Splice Isoform 1 of Hematological and neurological expressed 1-like protein | 0.76               | 0.03           | 2                                               | 2                           | 8.95%              |
| NP_112738     | IPI00220684,<br>IPI00220685,<br>IPI00382617, IPI00477150                                 | Splice Isoform 1 of Heterogeneous nuclear ribonucleoprotein D0              | 0.78               | 0.00           | 51                                              | 7                           | 16.30%             |
| NP_036350     | IPI00298788, IPI00418313                                                                 | Splice Isoform 1 of Interleukin enhancer-binding factor 3                   | 0.83               | 0.04           | 75                                              | 12                          | 21.00%             |
| NP_002473     | IPI00179953                                                                              | Splice Isoform 1 of Nuclear autoantigenic sperm protein                     | 0.78               | 0.04           | 5                                               | 4                           | 19.20%             |
| NP_078862     | IPI00077853,<br>IPI00170891,<br>IPI00218449, IPI00307359                                 | Splice Isoform 1 of Oxysterol binding protein-related protein 9             | 1.27               | 0.01           | 6                                               | 3                           | 4.34%              |
| NP_150091     | IPI00028122                                                                              | Splice Isoform 1 of PC4 and SFRS1 interacting protein                       | 0.62               | 0.01           | 9                                               | 4                           | 8.87%              |

\* % Coverage = the # of amino acids in all unique peptides identified with 1 % FPR divided by the total # of amino acids in the protein listed. This is the largest % coverage identified for all three search algorithm identifications.

| <u>RefSeq</u>  | <u>IPI</u>                                                                                                                                                   | <u>Protein Name</u>                                                       | <u>Fold Change</u> | <u>p-value</u> | <u># of spectra utilized for quantification</u> | <u># of unique peptides</u> | <u>% Coverage*</u> |
|----------------|--------------------------------------------------------------------------------------------------------------------------------------------------------------|---------------------------------------------------------------------------|--------------------|----------------|-------------------------------------------------|-----------------------------|--------------------|
| NP_478059      | IPI00001734                                                                                                                                                  | Splice Isoform 1 of Phosphoserine aminotransferase                        | 0.57               | 0.02           | 27                                              | 4                           | 8.65%              |
| NP_001018077   | IPI00410693,<br>IPI00412714,<br>IPI00470497, IPI00470498                                                                                                     | Splice Isoform 1 of Plasminogen activator inhibitor 1 RNA-binding protein | 0.78               | 0.01           | 19                                              | 4                           | 11.50%             |
| NP_000436.2    | IPI00014898, IPI00186711,<br>IPI00215942, IPI00215943,<br>IPI00398002, IPI00398775,<br>IPI00398776, IPI00398777,<br>IPI00398778, IPI00398779,<br>IPI00420096 | Splice Isoform 1 of Plectin 1                                             | 1.33               | 0.08           | 2                                               | 2                           | 0.45%              |
| NP_006377      | IPI00023785,<br>IPI00651653, IPI00651677                                                                                                                     | Splice Isoform 1 of Probable ATP-dependent RNA helicase DDX17             | 0.87               | 0.07           | 21                                              | 6                           | 10.90%             |
| NP_056374.1    | IPI00072377                                                                                                                                                  | Splice Isoform 1 of SET protein                                           | 0.82               | 0.04           | 73                                              | 8                           | 33.10%             |
| NP_005753      | IPI00438229, IPI00438230                                                                                                                                     | Splice Isoform 1 of Transcription intermediary factor 1-beta              | 0.85               | 0.04           | 54                                              | 10                          | 15.10%             |
| NP_000382      | IPI00298237,<br>IPI00554538, IPI00554617                                                                                                                     | Splice Isoform 1 of Tripeptidyl-peptidase I precursor                     | 1.40               | 0.01           | 15                                              | 3                           | 7.46%              |
| NP_003366.2    | IPI00024145, IPI00216024,<br>IPI00216026, IPI00216027,<br>IPI00411815, IPI00455531,<br>IPI00642484                                                           | Splice Isoform 1 of Voltage-dependent anion-selective channel protein 2   | 0.78               | 0.03           | 53                                              | 3                           | 10.40%             |
| NP_001322.1    | IPI00182469, IPI00182540,<br>IPI00219725, IPI00219726,<br>IPI00219727, IPI00219728,<br>IPI00219730, IPI00219731,<br>IPI00219732, IPI00219733,                | Splice Isoform 1AB of Catenin delta-1                                     | 1.25               | 0.01           | 25                                              | 5                           | 8.17%              |
| NP_112556      | IPI00334587, IPI00334713                                                                                                                                     | Splice Isoform 2 of Heterogeneous nuclear ribonucleoprotein A/B           | 0.85               | 0.02           | 30                                              | 5                           | 15.70%             |
| NP_006176.2    | IPI00006196,<br>IPI00292771, IPI00619936                                                                                                                     | Splice Isoform 2 of Nuclear mitotic apparatus protein 1                   | 1.18               | 0.09           | 7                                               | 2                           | 1.48%              |
| NP_954654      | IPI00220740                                                                                                                                                  | Splice Isoform 2 of Nucleophosmin                                         | 0.86               | 0.03           | 104                                             | 12                          | 57.40%             |
| XP_001133946.1 | IPI00451401                                                                                                                                                  | Splice Isoform 2 of Triosephosphate isomerase                             | 0.84               | 0.03           | 44                                              | 9                           | 46.40%             |
| NP_001014157.1 | IPI00216256                                                                                                                                                  | Splice Isoform 2 of WD-repeat protein 1                                   | 1.19               | 0.04           | 6                                               | 4                           | 9.94%              |
| NP_787045      | IPI00218358                                                                                                                                                  | Splice Isoform 3 of DNA                                                   | 0.71               | 0.06           | 7                                               | 5                           | 7.53%              |
| NP_127493      | IPI00217449,<br>IPI00217450, IPI00293242                                                                                                                     | Splice Isoform 3 of General transcription factor II-I                     | 0.69               | 0.02           | 10                                              | 5                           |                    |

\* % Coverage = the # of amino acids in all unique peptides identified with 1 % FPR divided by the total # of amino acids in the protein listed. This is the largest % coverage identified for all three search algorithm identifications.

| <u>RefSeq</u> | <u>IPI</u>                                                               | <u>Protein Name</u>                                                          | <u>Fold Change</u> | <u>p-value</u> | <u># of spectra utilized for quantification</u> | <u># of unique peptides</u> | <u>% Coverage*</u> |
|---------------|--------------------------------------------------------------------------|------------------------------------------------------------------------------|--------------------|----------------|-------------------------------------------------|-----------------------------|--------------------|
| NP_898868     | IPI00216542,<br>IPI00385321,<br>IPI00418316,<br>IPI00552796, IPI00640598 | Splice Isoform 5 of Protein kinase C binding protein 1                       | 0.79               | 0.00           | 3                                               | 2                           | 1.61%              |
| NP_112533     | IPI00396378,<br>IPI00414696, IPI00477522                                 | Splice Isoform B1 of Heterogeneous nuclear ribonucleoproteins A2/B1          | 0.90               | 0.10           | 364                                             | 18                          | 55.50%             |
| NP_057441     | IPI00008918                                                              | Splice Isoform Beta of Epithelial protein lost in neoplasm                   | 2.10               | 0.10           | 3                                               | 2                           | 3.95%              |
| NP_000170     | IPI00106847, IPI00384456                                                 | Splice Isoform GTBP-alt of DNA mismatch repair protein MSH6                  | 0.80               | 0.08           | 4                                               | 2                           | 1.62%              |
| NP_000810     | IPI00025273                                                              | Splice Isoform Long of Trifunctional purine biosynthetic protein adenosine-3 | 0.83               | 0.01           | 12                                              | 3                           | 3.56%              |
| NP_005868     | IPI00017451                                                              | Splicing factor 3 subunit 1                                                  | 0.90               | 0.01           | 8                                               | 2                           | 3.91%              |
| NP_009096     | IPI00017341                                                              | Splicing factor 3A subunit 2                                                 | 0.81               | 0.09           | 8                                               | 2                           | 3.66%              |
| NP_036565     | IPI00026089                                                              | Splicing factor 3B subunit 1                                                 | 0.68               | 0.10           | 3                                               | 2                           | 1.92%              |
| NP_003137     | IPI00005154                                                              | Structure-specific recognition protein 1                                     | 0.76               | 0.00           | 44                                              | 6                           | 6.63%              |
| NP_006592     | IPI00015029,<br>IPI00479875, IPI00656118                                 | Telomerase-binding protein p23                                               | 0.85               | 0.07           | 8                                               | 2                           | 16.90%             |
| NP_009057     | IPI00022774, IPI00478540                                                 | Transitional endoplasmic reticulum ATPase                                    | 1.15               | 0.01           | 48                                              | 10                          | 16.30%             |
| NP_001055     | IPI00021716,<br>IPI00643920, IPI00646755                                 | Transketolase                                                                | 1.21               | 0.00           | 34                                              | 13                          | 29.40%             |
| NP_009145     | IPI00218922, IPI00643718                                                 | Translocation protein SEC63 homolog                                          | 0.87               | 0.01           | 6                                               | 2                           | 3.43%              |
| NP_000356     | IPI00465028                                                              | Triosephosphate isomerase 1 variant                                          | 0.84               | 0.02           | 54                                              | 9                           | 45.80%             |
| NP_000357     | IPI00018853,<br>IPI00216135, IPI00296039                                 | Tropomyosin isoform                                                          | 1.22               | 0.05           | 8                                               | 3                           | 14.40%             |
| NP_004175     | IPI00295400                                                              | Tryptophanyl-tRNA synthetase                                                 | 0.82               | 0.02           | 11                                              | 3                           | 6.79%              |
| NP_006000     | IPI00180675                                                              | Tubulin alpha-3 chain                                                        | 0.86               | 0.00           | 151                                             | 19                          | 61.40%             |
| NP_006073     | IPI00387144                                                              | Tubulin alpha-ubiquitous chain                                               | 0.85               | 0.00           | 199                                             | 19                          | 61.40%             |
| NP_821133     | IPI00011654                                                              | Tubulin beta-2 chain                                                         | 0.82               | 0.00           | 375                                             | 19                          | 61.50%             |
| NP_006079     | IPI00007752                                                              | Tubulin beta-2C chain                                                        | 0.78               | 0.00           | 69                                              | 7                           | 24.00%             |
| NP_006077     | IPI00013683                                                              | Tubulin beta-3 chain                                                         | 0.80               | 0.00           | 152                                             | 14                          | 39.10%             |
| NP_005142     | IPI00219913, IPI00640357                                                 | Ubiquitin carboxyl-terminal hydrolase 14                                     | 0.89               | 0.00           | 2                                               | 2                           | 5.48%              |
| NP_004172     | IPI00018352                                                              | Ubiquitin carboxyl-terminal hydrolase isozyme L1                             | 0.68               | 0.00           | 26                                              | 5                           | 29.60%             |
| NP_003325     | IPI00645078                                                              | Ubiquitin-activating enzyme E1                                               | 0.85               | 0.08           | 18                                              | 4                           | 4.35%              |
| NP_002865     | IPI00008223                                                              | UV excision repair protein RAD23, homolog B                                  | 1.44               | 0.06           | 11                                              | 3                           | 12.00%             |
| NP_003371     | IPI00418471, IPI00646867                                                 | Vimentin                                                                     | 0.75               | 0.08           | 48                                              | 10                          | 26.90%             |

\* % Coverage = the # of amino acids in all unique peptides identified with 1 % FPR divided by the total # of amino acids in the protein listed. This is the largest % coverage identified for all three search algorithm identifications.



| <u>RefSeq</u> | <u>IPI</u>  | <u>Protein Name</u>                                                                             | <u>Fold Change</u> | <u>p-value</u> | <u># of spectra utilized for quantification</u> | <u># of unique peptides</u> | <u>% Coverage*</u> |
|---------------|-------------|-------------------------------------------------------------------------------------------------|--------------------|----------------|-------------------------------------------------|-----------------------------|--------------------|
| NP_057085     | IPI00000733 | WD-repeat protein 50                                                                            | 0.73               | 0.07           | 24                                              | 2                           | 5.76%              |
| NP_057396     | IPI00170786 | WW domain-binding protein 11                                                                    | 0.76               | 0.03           | 9                                               | 2                           | 5.30%              |
| NP_001203     | IPI00014230 | Complement component 1, Q subcomponent binding protein, mitochondrial precursor                 | 0.61               | 0.04           | 10                                              | 3                           | 19.20%             |
| NP_006550     | IPI00008575 | Splice Isoform 1 of KH domain containing, RNA binding, signal transduction associated protein 1 | 0.86               | 0.05           | 7                                               | 4                           | 10.40%             |
| NP_000692     | IPI00006482 | Splice Isoform Long of Sodium/potassium-transporting ATPase alpha-1 chain precursor             | 1.10               | 0.01           | 18                                              | 3                           | 2.93%              |

\* % Coverage = the # of amino acids in all unique peptides identified with 1 % FPR divided by the total # of amino acids in the protein listed. This is the largest % coverage identified for all three search algorithm identifications.
