# Supplementary material
Source: PubMed Central journal article supplement (PMC2401335)
Supplement: M700399-MCP200_4.pdf [file M700399-MCP200_4.pdf]

**Supplementary Table 3:** Listing of proteins identified in global proteomics experiments with high confidence and differential expression,  $\leq / \geq 10\%$ ,  $p \leq 0.1$ , after exposure to both noggin and BMP4 protein. Relative ratio, p-value, # of spectra used for quantification, # of unique peptides, and % protein coverage are on both Supplementary Table 2 and Supplementary Table 3.

**Differentially Regulated by Both Treatments**

**Decreased in Both Treatments**

NP\_000970            60S ribosomal protein L18  
 NP\_001001            40S ribosomal protein S6

**Increased in Both Treatments**

NP\_001448            Splice Isoform 1 of Filamin-B  
 NP\_001559            Eukaryotic translation initiation factor 3 subunit 6  
 NP\_006308            Brain acid soluble protein 1  
 NP\_060530            Mitochondrial isoleucine tRNA synthetase  
 NP\_002297            LGALS3 protein  
 NP\_002746            Dual specificity mitogen-activated protein kinase kinase 1

**Opposite Directions**

|                |                                                                   | <b><u>Nog</u></b> | <b><u>BMP4</u></b> |
|----------------|-------------------------------------------------------------------|-------------------|--------------------|
| NP_001001521.1 | UGP2                                                              | Increased         | Decreased          |
| NP_001008493   | Enabled protein homolog                                           | Increased         | Decreased          |
| NP_001377      | Dihydropyrimidinase-related protein 2                             | Increased         | Decreased          |
| NP_001378      | DPYSL3 protein                                                    | Increased         | Decreased          |
| NP_001312      | Cysteine and glycine-rich protein 2                               | Increased         | Decreased          |
| NP_653171      | Hematological and neurological expressed 1-like protein           | Increased         | Decreased          |
| NP_006592      | Telomerase-binding protein p23                                    | Increased         | Decreased          |
| NP_006507      | Solute carrier family 2, facilitated glucose transporter member 1 | Decreased         | Increased          |
| NP_004172      | Ubiquitin carboxyl-terminal hydrolase isozyme L1                  | Increased         | Decreased          |
| NP_004175      | Tryptophanyl-tRNA synthetase                                      | Increased         | Decreased          |
| NP_004517      | DNA replication licensing factor MCM2                             | Increased         | Decreased          |
